# Supplementary material for: Contribution of Cytidine Deaminase to Thymidylate Biosynthesis in Trypanosoma brucei: Intracellular Localization and Properties of the Enzyme
Source: PubMed Central journal article supplement (PMC6686228; doi:10.1128/msphere.00374-19), 2019-08-07
Supplement: mSphere.00374-19-st001.pdf [file mSphere.00374-19-st001.pdf]

**TABLE S1** purification of recombinant TbCDA

| Purification step | Total protein (mg) | Specific activity ( $\mu\text{mol}/\text{min}\cdot\text{mg}$ ) | Total activity ( $\mu\text{mol}/\text{min}$ ) | Yield (%) |
|-------------------|--------------------|----------------------------------------------------------------|-----------------------------------------------|-----------|
| Crude extract     | 235.80             | 0.18                                                           | 41.66                                         | 100       |
| Hitrap+PD10       | 11.50              | 22.70                                                          | 261.05                                        | 16        |
